# Supplementary material
Source: PubMed Central journal article supplement (PMC3504993)

## **Supplementary Information**

### **Metabolic map and bioactivation of the anti-tumor drug noscapine**

Zhong-Ze Fang, Kristopher W. Krausz, Fei Li, Jie Cheng, Naoki Tanaka, and Frank J. Gonzalez\*

Laboratory of Metabolism, Center for Cancer Research, National Cancer Institute, National Institutes of Health, Bethesda, MD 20892, United States

Supplementary figure 1. Trend plots of phase I metabolites of noscapine in MLMs with and without noscapine. Metabolites codes are the same with those in Fig. 1.

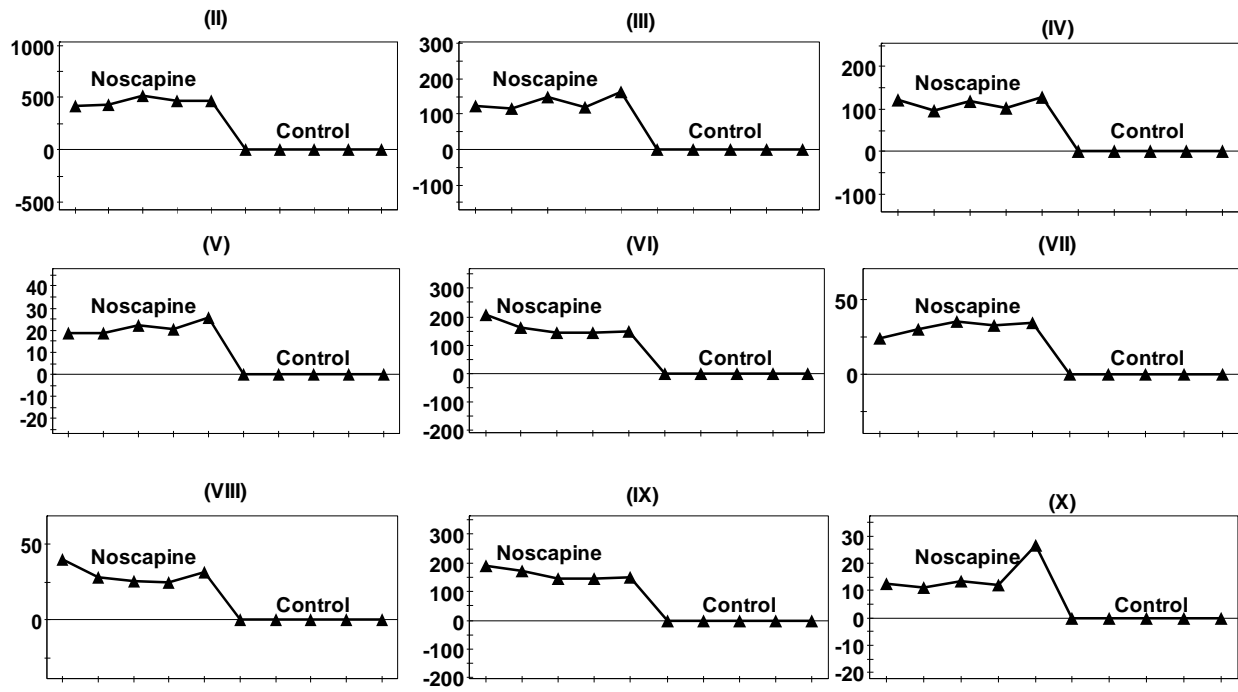

Supplementary figure 2. Trend plots of metabolites C1-C11 found in male 129 mice after oral gavage of 300 mg/kg BW.

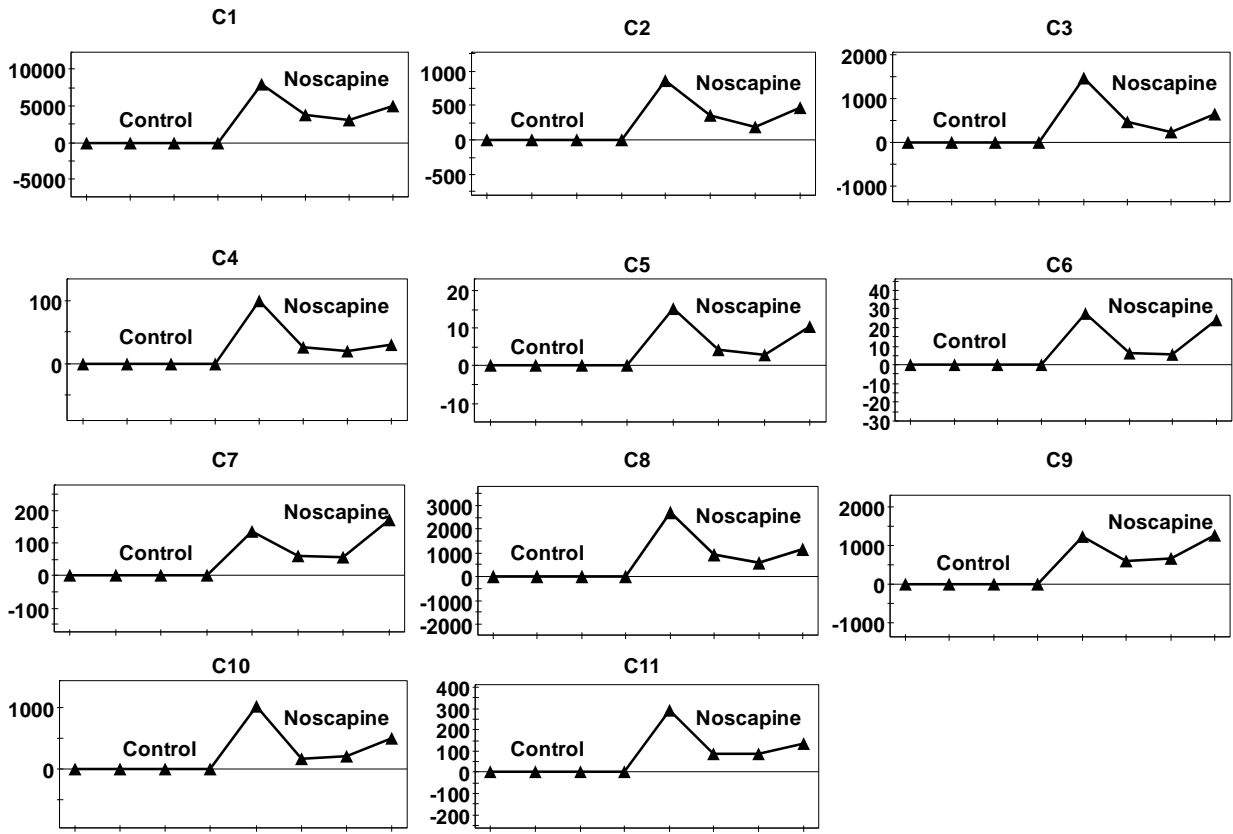

**Supplementary figure 3. The comparison of relative quantitation of metabolites. (A) The comparison of relative quantitative of phase I metabolites between MLM and HLM incubation system. (B) The comparison of relative quantitative of metabolites in the urine between male Sv/129 mice and C57BL/6 mice.**

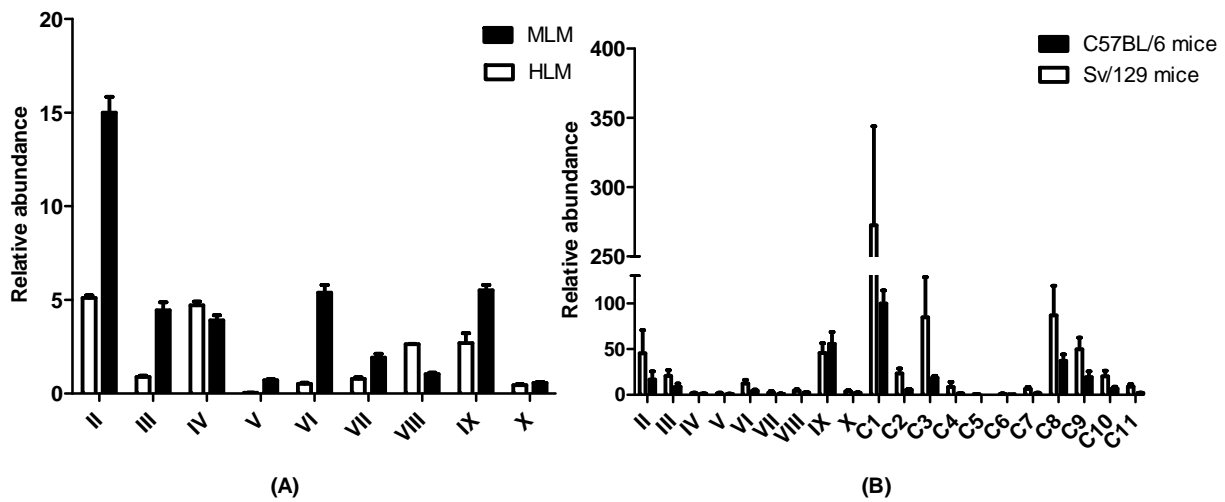

**Supplementary figure 4. Determination of ALT (A), AST (B) and ALP (C) activity in serum obtained from control (n=3) and noscapine-treated (n=5) C57BL/6 mice. The results were given as Mean±S.D..**

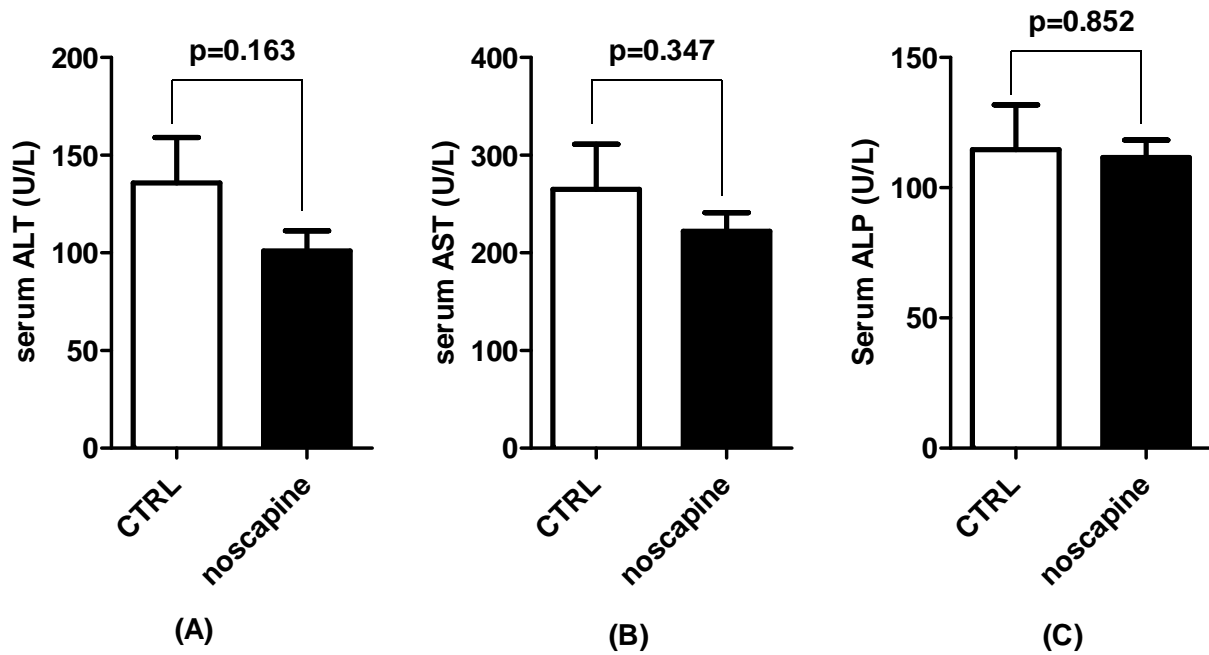

Supplement: bph0167-1271-SD1.pdf [file bph0167-1271-SD1.pdf]
